# Supplementary material
Source: publisher figshare collection journal article supplement (https://tandf.figshare.com/ndownloader/files/10076820)
Supplement: Supplementary file 1 [file 10076820]

Table.S1 List of primers used in the present study.

| Purpose | Primer 5'- 3' | Name of the primer | Name of Gene | S.No |
| --- | --- | --- | --- | --- |
| Q-PCR | CCAACATGCCCAGTCAAGAA | FWWRKY45 | SlWRKY45 | 1. |
| Q-PCR | GAGGATGGTTGTGTTCCCCTT | RWWRKY45 |  |  |
| Q-PCR | AAA TCG ATC GGC GAC AGA AAA CG | SlCRF1Fp | SlCRF1 | 2. |
| Q-PCR | CCC GAA TCT CTG CAG CCC AA | SlCRF1Rp |  |  |
| Q-PCR | AGC TTC AGG TAA AAG AGG GAG TCA | SlCRF3Fp | SlCRF3 | 3. |
| Q-PCR | TCC GGC GCG TGA ATA CGT AC | SlCRF3Rp |  |  |
| Q-PCR | GGC GTT GAA AGG GAA GGA AGT | SlCRF6Fp | SlCRF6 | 4. |
| Q-PCR | TAA CCA GAG CCT AAC GCG ACG | SlCRF6Rp |  |  |
| Q-PCR | AGC TCG AAT AAC GAA TGC AAC AAC | SICRF10Fp | SICRF10 | 5. |
| Q-PCR | GAT GCT GGA GAT GTG TGT GAA GTA TGT | SICRF10Rp |  |  |
| Q-PCR | CTT ACT CCG TGC CAT CCG TTT TC | SlGH3.4Fp | SlGH3.4 | 6. |
| Q-PCR | GGG AAA TGC AAT TTC GGA TAG ACG GGT | SlGH3.4Rp |  |  |
| Q-PCR | GGC AAC AAA CGA GGA TTT TCA GAC G | SlIAA9Fp | SlIAA9 | 7. |
| Q-PCR | TAG GTG GTT GCA CAC GTG AGG | SlIAA9Rp |  |  |
| Q-PCR | CAA CAG CCT CCT GTG CAA GAG | SlARF6Fp | SlARF6 | 8. |
| Q-PCR | CAC ACT CCA TCC TGT CGT CAG GAG | SlARF6Rp |  |  |
| Q-PCR | CGG TGC ACC ATA CTT ACG TAA AGT | SlIAA16Fp | SlIAA16 | 9. |
| Q-PCR | GAG TCC CAC AAT TTC CAA TAG TAA AAG AGC T | SlIAA16Rp |  |  |
| Q-PCR | ATGTATGTTGCCATCCAGGCT | 341F actin | SlActin | 10. |
| Q-PCR | TGTGGCTGACACGATCTCCA | 431R actin |  |  |
| Q-PCR | ACCATTTGATCTCTGCAACCATG | 793F Tubulin | SlTubulin | 11. |
| Q-PCR | TTCACAGCCAATTTCCTCAGG | 833R Tubulin |  |  |
| Q-PCR | GAAACGGCTACCACATCCAAG | Sl18s F | Sl18s | 12. |
| Q-PCR | CCCCGTGTTAGGATTGGGT | Sl18s R |  |  |
| Q-PCR | GAGGGCAGCCGTGCAA | Sl.PR-1a.F | Sl -PR1a | 13. |
| Q-PCR | CACATTTTTCCACCAACACATTG | Sl.PR-1a.R |  |  |
| Q-PCR | CAATGGCTTCTTACTGCTCGG | Sl.PAL5.F | Sl -PAL5 | 14. |
| Q-PCR | CATCTTGGTTGTGTTGCTCAGC | Sl.PAL5.R |  |  |
| Q-PCR | GCTAACGGTCTTGCCAGAAGG | Sl-SAM2.F | Sl -SAM2 | 15. |
| Q-PCR | CCCAGTTCCATAAGTGTCCACAAA | Sl-SAM2.R |  |  |
| Q-PCR | CCATGTCCTAAGCCCGATTTGAT | Sl-ACO1.F | Sl -ACO1 | 16. |
| Q-PCR | ACTCACTTTGTCATCTTGGAACAGA | Sl-ACO1.R |  |  |
| Q-PCR | GCACGAAGAAGAGAAGAAAGGAGAT | Sl-AOC.F | Sl -AOC | 17. |
| Q-PCR | CGGTGACGGCTAGGTAAGTTTC | Sl-AOC.R |  |  |
| Q-PCR | TTGGCTTAGCAGTTGTTGAAAG | Sl-OPR3.F | Sl-OPR3 | 18. |
| Q-PCR | TACGTATCGTGGCTGTGTATCA | Sl-OPR3.R |  |  |
| Q-PCR | TTGCTCTCCTCCTTTTATTTGG | Sl-PI-1.F | Sl-PI-1 | 19. |
| Q-PCR | GCAAGCCTTGGCATGTTC | Sl-PI-1.R |  |  |
| Q-PCR | GAGAATTTCAAGGAAGTTCAAGAAT | Tom-MC.F | Sl-MC | 20. |
| Q-PCR | GGCTTTATTTCACACAGAGATAAAA | Tom-MC.R |  |  |
| Promoter-Gus | GTTAATCGTCATGGAGCTCCTCGTATAAG | WRKY45 Promo F1 | SlWRKY45 promoter | 21. |
|  | CCAGTCAGCTCCCGGGTGAATCTATAAGAAAAATTGTCC | WRKY45 Promo R1 |  |  |
| Over  expression | gtatgGGTACCATGGATACAAACTTGG | OEWRKY Fp1 | SlWRKY45 | 22. |
|  | CCTAGAAGCTTTTATATAATTTTTTGCATTTGA | ExRp1 |  |  |
| Promoter-Gus | GATCTCAAATAATGAGCTCTGACTCA | WRKY35Fp | SlWRKY35  Promoter | 23. |
|  | GTAACCATaaCCCGGGCATAGATAAATCACTTC | WRKY35Rp |  |  |
